# Supplementary material
Source: PubMed Central journal article supplement (PMC6635838)

## IBD Symptom Inventory (IBDSI) – Long Form

Please rate how frequent or severe the symptoms were that you experienced in the following areas over the **past week**:

1. My health was:

- Very Good (0) |  Good (0) |  Slightly Below Par (1) |  Poor (2) |  Very Poor (3) |  Terrible (4)

2. I had abdominal pain:

- None (0) |  Mild (1) |  Moderate (2) |  Prolonged/ Severe (4)

3. On average, the number of bowel movements I had each day was:

- Less than one a day (0) |  1 |  2 |  3 (1) |  4 (2) |  5 (3) |  6 (4) |  7 |  8 |  9 |  10 or More

4. The number of loose/liquid bowel movements or diarrhea I had most days was:

- None |  Some, but less than one a day (0) |  1 (1) |  2 |  3 (2) |  4 (3) |  5 |  6 (4) |  7 |  8 |  9 |  10 or More

5. My stool consistency was generally:

- Formed (0) |  Loose (1) |  Liquid (2)

6. I noticed blood in my stool:

- None (0) |  Trace amounts (2) |  Obvious bleeding (4)

7. I had loss of appetite:

- None (0) |  Mild (1) |  Moderate (2) |  Prolonged/ Severe (4)

8. I had nausea:

- None (0) |  Mild (1) |  Moderate (2) |  Prolonged/ Severe (4)

9. I had vomiting:

- None (0) |  Mild (1) |  Moderate (2) |  Prolonged/ Severe (4)

10. I had tenderness in my abdomen when touched:

- None (0) |  Minimal (1) |  Moderate (2) |  Severe (3) |  So severe that I pull away when touched (4)

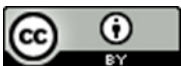

How much difficulty have you had with the following during the **past week**?

| Symptoms:                                                                            | None<br>(0)                     | A Little<br>(1)                                  | Moderate<br>(2)                         | Quite a<br>Lot (3)                                                     | Severe<br>(4)            |
|--------------------------------------------------------------------------------------|---------------------------------|--------------------------------------------------|-----------------------------------------|------------------------------------------------------------------------|--------------------------|
| 11. Feeling fatigued or tired and worn out                                           | <input type="checkbox"/>        | <input type="checkbox"/>                         | <input type="checkbox"/>                | <input type="checkbox"/>                                               | <input type="checkbox"/> |
| 12. Excessive bowel gas (farting)                                                    | <input type="checkbox"/>        | <input type="checkbox"/>                         | <input type="checkbox"/>                | <input type="checkbox"/>                                               | <input type="checkbox"/> |
| 13. Losing control of bowel movements                                                | <input type="checkbox"/>        | <input type="checkbox"/>                         | <input type="checkbox"/>                | <input type="checkbox"/>                                               | <input type="checkbox"/> |
| 14. Abdominal bloating                                                               | <input type="checkbox"/>        | <input type="checkbox"/>                         | <input type="checkbox"/>                | <input type="checkbox"/>                                               | <input type="checkbox"/> |
| 15. Waking because of urge to have bowel movements                                   | <input type="checkbox"/>        | <input type="checkbox"/>                         | <input type="checkbox"/>                | <input type="checkbox"/>                                               | <input type="checkbox"/> |
| 16. Waking because of abdominal pain                                                 | <input type="checkbox"/>        | <input type="checkbox"/>                         | <input type="checkbox"/>                | <input type="checkbox"/>                                               | <input type="checkbox"/> |
| 17. Urgency of bowel movements                                                       | <input type="checkbox"/>        | <input type="checkbox"/>                         | <input type="checkbox"/>                | <input type="checkbox"/>                                               | <input type="checkbox"/> |
| 18. Finding it hard to get things done                                               | <input type="checkbox"/>        | <input type="checkbox"/>                         | <input type="checkbox"/>                | <input type="checkbox"/>                                               | <input type="checkbox"/> |
| 19. Difficulty releasing gas                                                         | <input type="checkbox"/>        | <input type="checkbox"/>                         | <input type="checkbox"/>                | <input type="checkbox"/>                                               | <input type="checkbox"/> |
| 20. Urge for bowel movement despite empty bowels                                     | <input type="checkbox"/>        | <input type="checkbox"/>                         | <input type="checkbox"/>                | <input type="checkbox"/>                                               | <input type="checkbox"/> |
| 21. Feeling generally unwell                                                         | <input type="checkbox"/>        | <input type="checkbox"/>                         | <input type="checkbox"/>                | <input type="checkbox"/>                                               | <input type="checkbox"/> |
| 22. Soiling underwear                                                                | <input type="checkbox"/>        | <input type="checkbox"/>                         | <input type="checkbox"/>                | <input type="checkbox"/>                                               | <input type="checkbox"/> |
| 23. Abdominal cramps                                                                 | <input type="checkbox"/>        | <input type="checkbox"/>                         | <input type="checkbox"/>                | <input type="checkbox"/>                                               | <input type="checkbox"/> |
| 24. Having low energy                                                                | <input type="checkbox"/>        | <input type="checkbox"/>                         | <input type="checkbox"/>                | <input type="checkbox"/>                                               | <input type="checkbox"/> |
| 25. Having trouble maintaining or gaining weight                                     | <input type="checkbox"/>        | <input type="checkbox"/>                         | <input type="checkbox"/>                | <input type="checkbox"/>                                               | <input type="checkbox"/> |
| 26. Fever over 37.8 °C or 100 °F                                                     | <input type="checkbox"/>        | <input type="checkbox"/>                         | <input type="checkbox"/>                | <input type="checkbox"/>                                               | <input type="checkbox"/> |
| 27. a) Has your doctor ever told you that you have a mass or a lump in your abdomen? | <input type="checkbox"/> No     | <input type="checkbox"/> Yes                     |                                         |                                                                        |                          |
| b) In the past week, I had a lump in my abdomen:                                     | <input type="checkbox"/> No (0) | <input type="checkbox"/> Maybe, hard to tell (1) | <input type="checkbox"/> Definitely (3) | <input type="checkbox"/> Definitely, and it is tender when touched (4) |                          |

During the **past week**, have you had any of the following **complications of IBD**?

(Terms your doctor might use are in italics.)

| IBD Complications:                                                                                                             | None<br>(0)              | Mild<br>(1)              | Moderate<br>(2)          | Severe<br>(4)            |
|--------------------------------------------------------------------------------------------------------------------------------|--------------------------|--------------------------|--------------------------|--------------------------|
| 28. Joint pain ( <i>arthralgia/arthritis</i> ):                                                                                | <input type="checkbox"/> | <input type="checkbox"/> | <input type="checkbox"/> | <input type="checkbox"/> |
| 29. Inflammation of the coloured part of the eyes ( <i>uveitis/iritis</i> ):                                                   | <input type="checkbox"/> | <input type="checkbox"/> | <input type="checkbox"/> | <input type="checkbox"/> |
| 30. Tender red lumps on shins or arms ( <i>erythema nodosum</i> ):                                                             | <input type="checkbox"/> | <input type="checkbox"/> | <input type="checkbox"/> | <input type="checkbox"/> |
| 31. Small painful canker sores or ulcers in the mouth ( <i>apthous ulcers/apthous stomatitis</i> ):                            | <input type="checkbox"/> | <input type="checkbox"/> | <input type="checkbox"/> | <input type="checkbox"/> |
| 32. Painful sores or ulcerations on the skin ( <i>pyoderma gangrenosum</i> ):                                                  | <input type="checkbox"/> | <input type="checkbox"/> | <input type="checkbox"/> | <input type="checkbox"/> |
| 33. <i>Anal fissure</i> (a tear around the anus):                                                                              | <input type="checkbox"/> | <input type="checkbox"/> | <input type="checkbox"/> | <input type="checkbox"/> |
| 34. <i>Abscess</i> (a localized collection of pus surrounded by inflamed or infected tissue – inside the body or on the skin): | <input type="checkbox"/> | <input type="checkbox"/> | <input type="checkbox"/> | <input type="checkbox"/> |

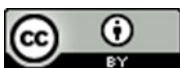

35. a) Do you have a *fistula*? (a fistula is any path from the bowel to other organs, or from the bowel to the outside skin)

Yes (1)                    |     No (0)

b) If Yes please mark all that apply:

Around your anus

Within your intestine

To your skin

To your bladder

To your vagina

To your scrotum or penis

Other Please specify: \_\_\_\_\_

c) Has the fistula been active (sore, swollen, or draining) during the past week?

No (0)                    |     A Little (1)                    |     Moderately (2)                    |     Quite a Lot (3)                    |     Severely (4)

d) Is this a new fistula you have developed in the past week?

No                    |     Yes, and it is mildly active                    |     Yes, and it is moderately active                    |     Yes, it is severe

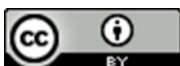

Supplement: izz038_suppl_appendix-a.pdf [file izz038_suppl_appendix-a.pdf]
