# Supplementary material
Source: PubMed Central journal article supplement (PMC6635838)

## IBD Symptom Inventory (IBDSI) – Short Form

Please rate how frequent or severe the symptoms were that you experienced in the following areas over the **past week**:

1. My health was:

- Very Good (0) |  Good (0) |  Slightly Below Par (1) |  Poor (2) |  Very Poor (3) |  Terrible (4)

2. I had abdominal pain:

- None (0) |  Mild (1) |  Moderate (2) |  Prolonged/ Severe (4)

3. On average, the number of bowel movements I had each day was:

- Less than one a day (0) |  1 |  2 |  3 (1) |  4 (2) |  5 (3) |  6 (4) |  7 |  8 |  9 |  10 or More

4. The number of loose/liquid bowel movements or diarrhea I had most days was:

- None |  Some, but less than one a day (0) |  1 (1) |  2 |  3 (2) |  4 (3) |  5 |  6 (4) |  7 |  8 |  9 |  10 or More

5. My stool consistency was generally:

- Formed (0) |  Loose (1) |  Liquid (2)

6. I noticed blood in my stool:

- None (0) |  Trace amounts (2) |  Obvious bleeding (4)

7. I had loss of appetite:

- None (0) |  Mild (1) |  Moderate (2) |  Prolonged/ Severe (4)

8. I had nausea:

- None (0) |  Mild (1) |  Moderate (2) |  Prolonged/ Severe (4)

9. I had vomiting:

- None (0) |  Mild (1) |  Moderate (2) |  Prolonged/ Severe (4)

10. I had tenderness in my abdomen when touched:

- None (0) |  Minimal (1) |  Moderate (2) |  Severe (3) |  So severe that I pull away when touched (4)

11. a) Has your doctor told you that you have a mass or a lump in your abdomen?

- No |  Yes

b) In the **past week**, I had a lump in my abdomen:

- No (0) |  Maybe, hard to tell (1) |  Definitely (3) |  Definitely, and it is tender when touched (4)

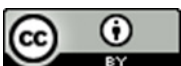

How much difficulty have you had with the following during the **past week**?

| Symptoms:                                          | None (0)                 | A Little (1)             | Moderate (2)             | Quite a Lot (3)          | Severe (4)               |
|----------------------------------------------------|--------------------------|--------------------------|--------------------------|--------------------------|--------------------------|
| 12. Feeling fatigued or tired and worn out         | <input type="checkbox"/> |
| 13. Excessive bowel gas (farting)                  | <input type="checkbox"/> |
| 14. Losing control of bowel movements              | <input type="checkbox"/> |
| 15. Abdominal bloating                             | <input type="checkbox"/> |
| 16. Waking because of urge to have bowel movements | <input type="checkbox"/> |
| 17. Waking because of abdominal pain               | <input type="checkbox"/> |
| 18. Urgency of bowel movements                     | <input type="checkbox"/> |
| 19. Finding it hard to get things done             | <input type="checkbox"/> |
| 20. Difficulty releasing gas                       | <input type="checkbox"/> |
| 21. Soiling underwear                              | <input type="checkbox"/> |
| 22. Abdominal cramps                               | <input type="checkbox"/> |

During the **past week**, have you had any of the following **complications of IBD**? (Terms your doctor might use are in italics.)

23. Joint pain (*arthralgia/arthritis*):

- None (0)       Mild (1)       Moderate (2)       Prolonged/ Severe (4)

24. Do you have a *fistula*? (a fistula is any path from the bowel to other organs, or from the bowel to the outside skin)

- Yes (1)       No (0)

25. **IF YES:** In the **past week**, my fistula was **sore, swollen, or draining**:

- No (0)       A Little (1)       Moderately (2)       Quite a Lot (3)       Severely (4)

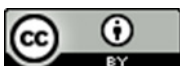

Supplement: izz038_suppl_appendix-b.pdf [file izz038_suppl_appendix-b.pdf]
